# Supplementary material for: Plasmonic tunable Ag-coated gold nanorod arrays as reusable SERS substrates for multiplexed antibiotics detection
Source: Royal Society of Chemistry journal article supplement (doi:10.1039/d0tb02540b), 2020-12-18
Supplement: d0tb02540b1.pdf [file d0tb02540b1.pdf]

## **Electronic Supplementary Information**

### **Plasmonics tunable Ag-coated gold nanorods arrays as reusable SERS substrates for multiplexed antibiotics detection**

Xiaoya Peng, Dan Li <sup>\*</sup>, Yuanting Li, Haibo Xing, Wei Deng

School of Chemical and Environmental Engineering, Shanghai Institute of  
Technology, 100 Haiquan Road, Shanghai 201418, PR China

<sup>\*</sup> Corresponding author phone/fax: +86-21-60873241; E-mail: dany@sit.edu.cn (D.  
Li).

**Raman Enhancement Factor.** The Raman enhancement factor (EF) of the AgNPs/GNRs array was calculated as given in Eq. 1 from the literature [1, 2]:

$$EF = (I_{SERS} / I_{bulk}) \times (N_{bulk} / N_{SERS}) \quad (1)$$

where  $I_{SERS}$  and  $I_{bulk}$  are the vibration intensities in the SERS of 4-aminothiophenol (4-ATP) and normal Raman spectra of 4-ATP, respectively.  $N_{bulk}$  and  $N_{SERS}$  are the number of molecules under laser illumination for the bulk sample, and the number of molecules in the self-assembled monolayers (SAMs), respectively. The  $N_{bulk}$  and  $N_{SERS}$  values can be calculated based on the concentration of surface species or bulk sample and the corresponding sampling areas. It is reported that the average surface density of 4-ATP molecules in densely packed monolayers is approximately one 4-ATP molecule per  $0.2 \text{ nm}^2$  [3]. Then the surface coverage of 4-ATP monolayer on AgNPs/GNRs array is  $8.31 \times 10^{-10} \text{ mol cm}^{-2}$  ( $\Gamma = 1 / [(0.2 \times 10^{-14}) \times (6.02 \times 10^{23})] \text{ mol cm}^{-2} = 8.31 \times 10^{-10} \text{ mol cm}^{-2}$ ). Taking the sampling area (ca.  $10 \text{ }\mu\text{m}$  in diameter) into account,  $N_{SERS}$  has a value of  $6.52 \times 10^{-16} \text{ mol}$  ( $N_{SERS} = \Gamma \times \pi \times (10/2)^2 \mu\text{m}^2 = 6.52 \times 10^{-16} \text{ mol}$ ). For the solid sample, the sampling volume is the product of the area of the laser spot (ca.  $10 \text{ }\mu\text{m}$  diameter) and the penetration depth ( $\sim 2 \text{ }\mu\text{m}$ ) of the focused laser beam. Assuming the density of bulk 4-ATP is  $1.18 \text{ g cm}^{-3}$  [4, 5],  $N_{bulk}$  can be calculated to be  $1.47 \times 10^{-12} \text{ mol}$  ( $N_{bulk} = 1.18 \text{ g cm}^{-3} \times \pi \times 25 \mu\text{m}^2 \times 2 \mu\text{m} / (125.19 \text{ g mol}^{-1}) = 1.47 \times 10^{-12} \text{ mol}$ ). For the vibrational mode at  $1080 \text{ cm}^{-1}$ , the ratio of  $I_{SERS}$  to  $I_{bulk}$  was about 55.6, so EF was calculated to be  $1.26 \times 10^5$  ( $55.6 \times [1.47 \times 10^{-12} / (6.52 \times 10^{-16})] = 1.26 \times 10^5$ ).

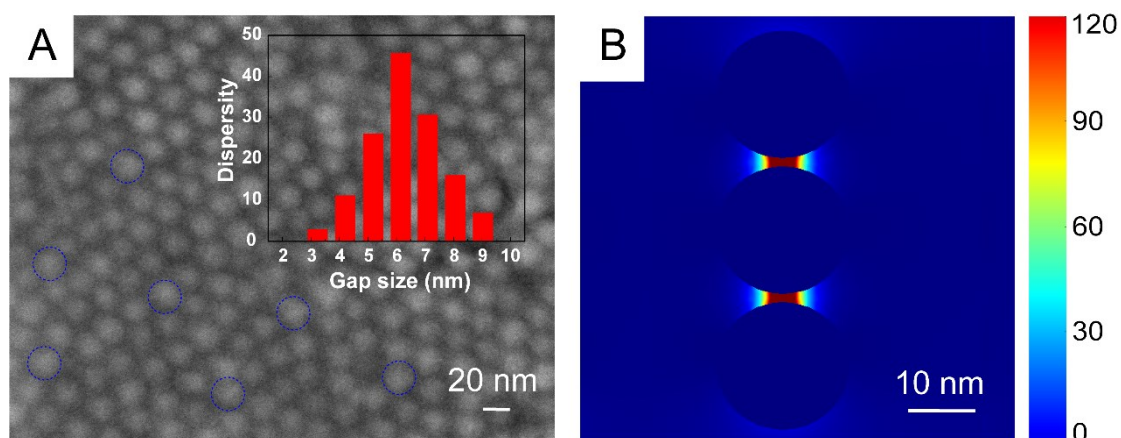

**Fig. S1** (A) Top-view SEM image of AgNPs/GNR arrays with electrodeposition time of 2 min. The inset shows the pitch distribution of more than 120 GNRs from the AgNPs/GNRs array substrate. (B) The simulated near-field images of GNRs array substrate.

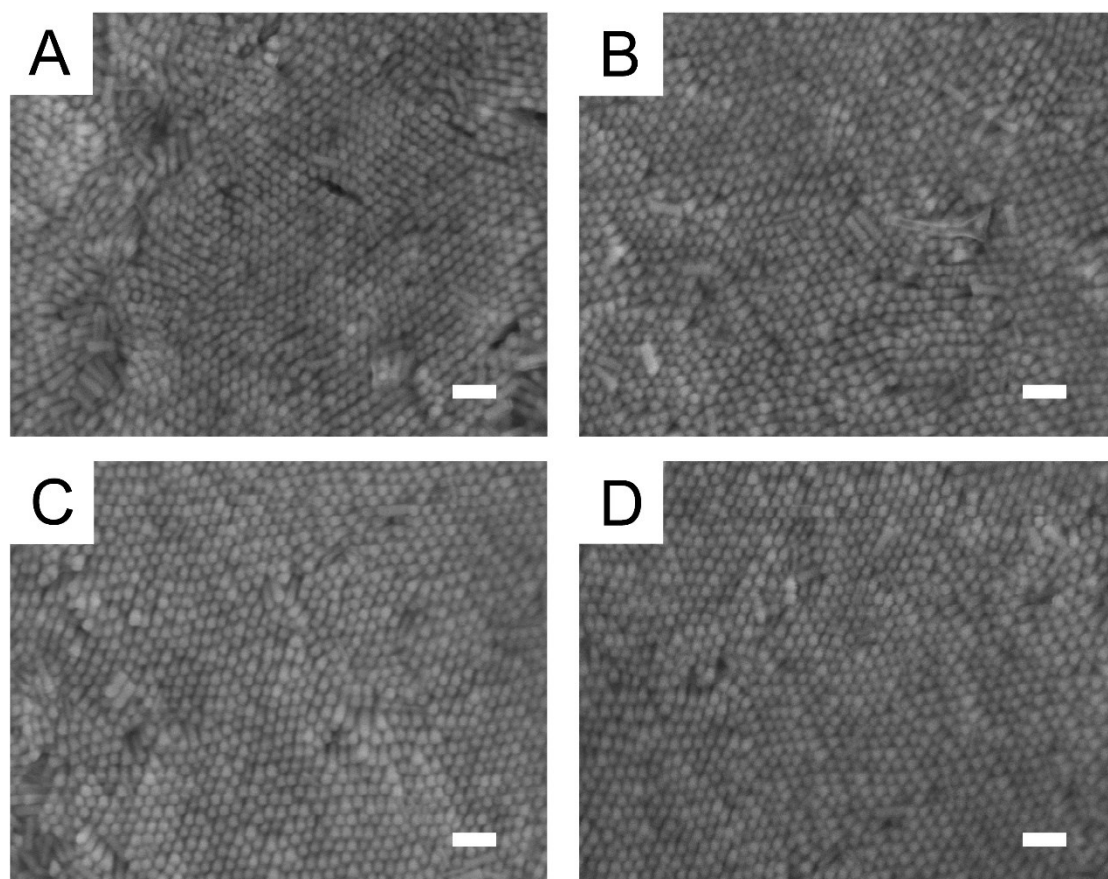

**Fig. S2** SEM images of the (A) first, (B) second, (C) third and (D) fourth batch of AgNPs/GNR array substrates. Scale bar in A-D is 100 nm.

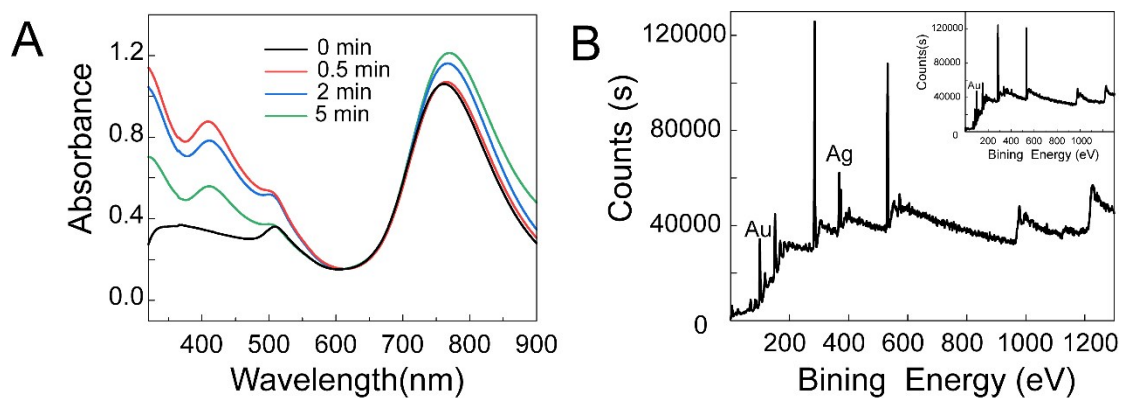

**Fig. S3** (A) UV-Vis-NIR spectrum of the GNRs and AgNPs/GNRs array under different electrodeposition times. (B) XPS spectra of AgNPs/GNRs and GNRs arrays (inset).

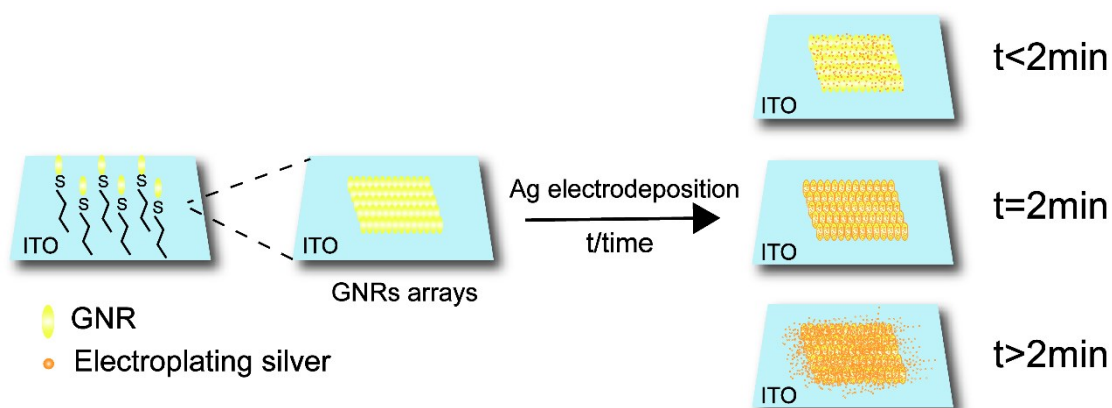

**Fig. S4** The possible formation mechanism of the electrodeposition of Ag on the GNRs array under different electrodeposition time ( $t$ ).

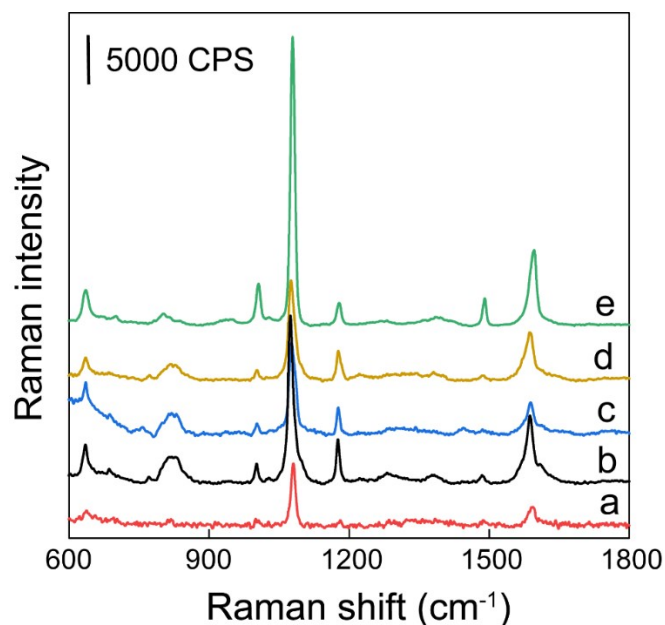

**Fig. S5** SERS spectra of 4-ATP (1  $\mu\text{M}$ ) on AgNPs (a), GNRs (b), electrodeposited GNPs (c), electrodeposited AgNPs (d), and the AgNPs/GNRs array (e).

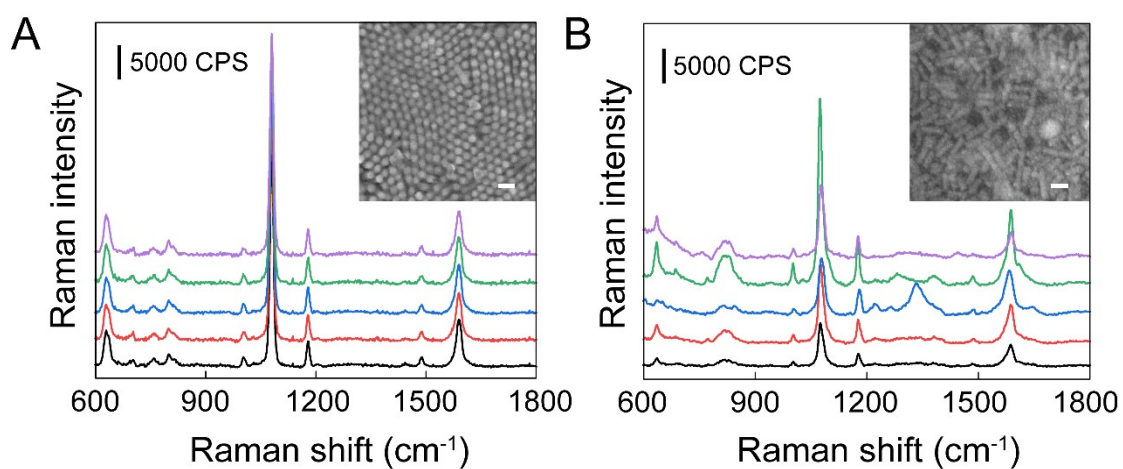

**Fig. S6** SERS spectra of 4-ATP (1  $\mu\text{M}$ ) from 5 different spots on the same AgNPs/GNRs array (A) and disordered GNRs coated with electrodeposited silver (B). The insets display SEM images of AgNPs/GNRs array and randomly distributed GNRs coated with electrodeposited silver, respectively. Scale bar in insets is 50 nm.

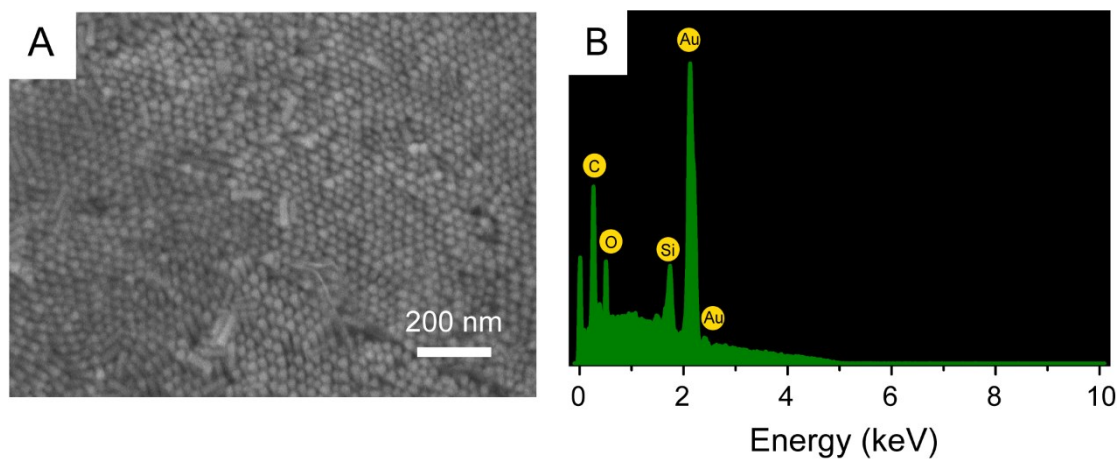

**Fig. S7** (A) SEM image of the after stripped GNRs array, and (B) EDX elemental mapping of the after stripped GNRs array.

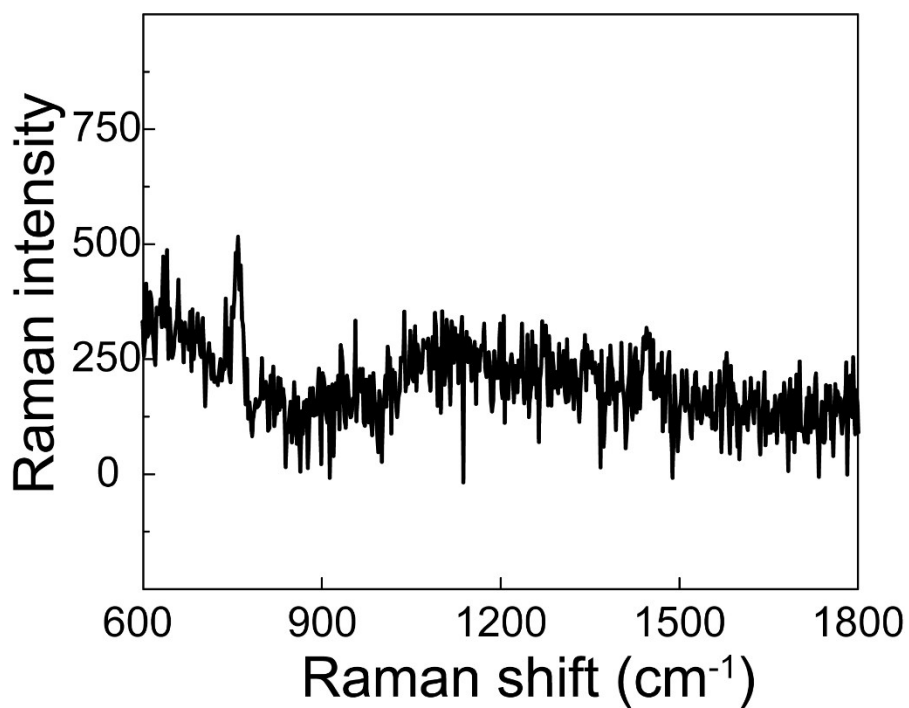

**Fig. S8** Raman spectra of the AgNPs/GNRs array.

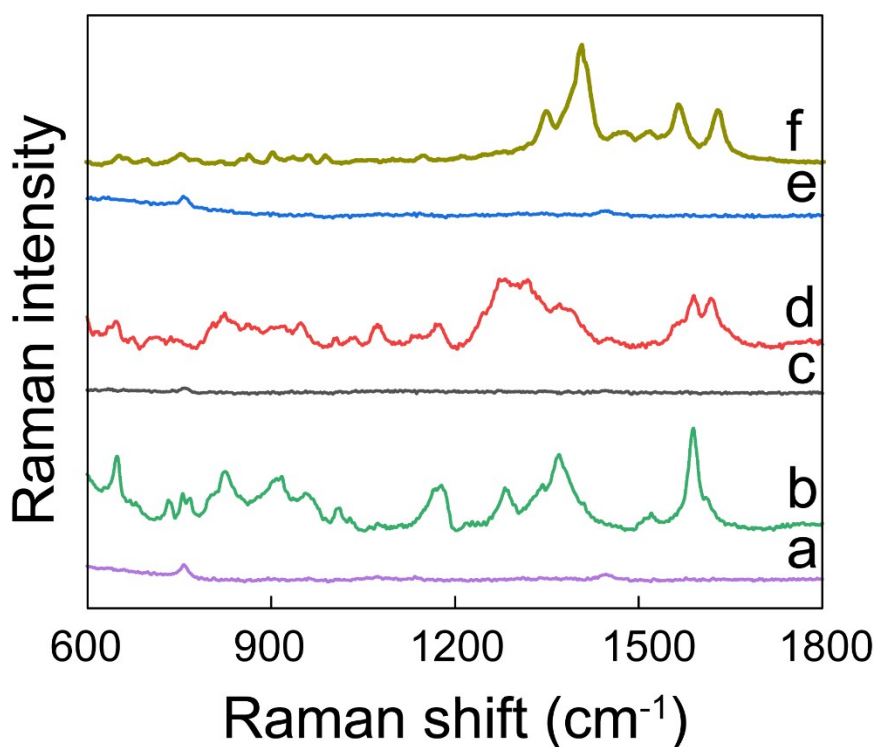

**Fig. S9** SERS spectra of AgNPs/GNRs array (a), SERS spectrum of  $10^{-6}$  M AM collected from the AgNPs/GNRs array (b) (the electrodeposition time of silver is 2 min), then the nanoarrays were stripped off and followed by silver electrodeposition for 2 min (c), and treated with the  $10^{-6}$  M TC (d) (the electrodeposition time of silver is 2 min), then the nanoarrays were stripped off and followed by silver electrodeposition for 2 min (e), and treated with the  $10^{-6}$  M OFX(f).

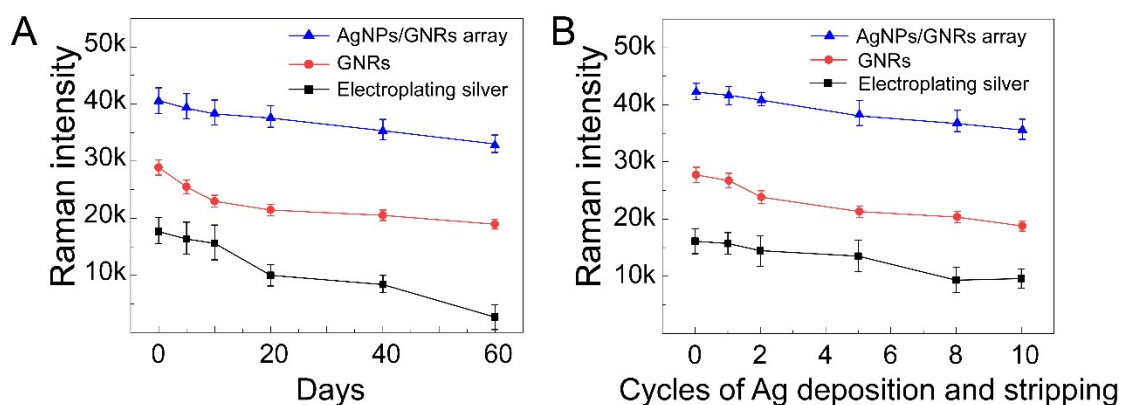

**Fig. S10** (A) SERS intensity at  $1080\text{ cm}^{-1}$  demonstrate the long-term stability of GNRs, electrodeposited AgNPs, and the AgNPs/GNRs array, respectively. (B) SERS intensity at  $1080\text{ cm}^{-1}$  investigation of the recyclability of GNRs, electrodeposited AgNPs, and the AgNPs/GNRs array after 1~10 electrodeposition/stripping Ag cycles. The error bars represent typical intensity variations obtained from the same sample measured at 5 different spots.

**Table S1.** Comparing the detection performance of different methods for antibiotics analysis.

| Methods          | Materials <sup>b</sup>                 | Antibiotics   | Linearity( $\mu\text{M}$ )                 | LOD( $\mu\text{M}$ )  | References |
|------------------|----------------------------------------|---------------|--------------------------------------------|-----------------------|------------|
| Electrochemistry | MIP                                    | Amoxicillin   | 1.6-1000                                   | 1.6                   | 6          |
| Electrochemistry | MWCNTs/CPE                             | Sulfapyridine | $6 \times 10^{-3}$ - $1.61 \times 10^{-1}$ | $4.9 \times 10^{-3}$  | 7          |
| ECL <sup>a</sup> | GE/H <sub>2</sub> O <sub>2</sub> /CTAB | Amoxicillin   | $4.32 \times 10^{-2}$ -0.1                 | $1.2 \times 10^{-2}$  | 8          |
| Colorimetry      | AuNPs                                  | Tetracycline  | $4.58 \times 10^{-1}$ -1                   | $4.58 \times 10^{-2}$ | 9          |
| Colorimetry      | AuNPs                                  | Amoxicillin   | 0.3-4.5                                    | 0.15                  | 10         |
| Fluorescence     | Mn-doped ZnS QDs                       | Sulfonamide   | 0.5-80                                     | 0.5                   | 11         |
| Fluorescence     | AuNPs/MBs                              | Ampicillin    | $2.48 \times 10^{-4}$ -2.48                | $1.68 \times 10^{-4}$ | 12         |
| SERS             | MWCNTs-AuNPs                           | Sulfonamide   | $4 \times 10^{-2}$ - $4 \times 10^{-1}$    | $3.5 \times 10^{-2}$  | 13         |
| SERS             | (3D) ZnO/Ag@Au substrate               | Sulfapyridine | $10^{-3}$ -1                               | $10^{-3}$             | 14         |
| SERS             | PDMS-Ag                                | Amoxicillin   | $2.4 \times 10^{-3}$ -2.4                  | $2.4 \times 10^{-3}$  | 15         |
| SERS             | AgNPs/GNRs arrays                      | Amoxicillin   | $1.5 \times 10^{-5}$ -200                  | $0.5 \times 10^{-5}$  | this work  |

<sup>a</sup>Electrochemiluminescence

<sup>b</sup>Abbreviations used: AMO-MIP QCM molecularly imprinted polymer and quartz crystal microbalance to detect amoxicillin; MWCNTs/CPE multi-walled carbon nanotubes modified carbon paste electrode; GE/H<sub>2</sub>O<sub>2</sub>/CTAB Graphite Electrode Hydrogen peroxide and cetyltrimethyl ammonium bromide; Aptamer-AuNPs the reaction between TC and aptamer lead to an aggregate of gold nanoparticles; AuNPs aggregation of citrate-capped gold nanoparticles; Mn-doped ZnS QDs: Mn-doped ZnS quantum dots; AuNPs/MBs gold nanoparticles modified magnetic bead composites; MWCNTs-AuNPs multi-walled carbon nanotubes and gold nanoparticles; (3D) ZnO/Ag@Au substrate three-dimensional structure of ZnO gold and silver substrate; PDMS-Ag polydimethylsiloxane silver dendrite.

**Table S2.** Experimental Raman shifts ( $\text{cm}^{-1}$ ) of amoxicillin (AM) [16].

| Experimental results / $\text{cm}^{-1}$ | Documented in the literature / $\text{cm}^{-1}$ | Assignment                            |
|-----------------------------------------|-------------------------------------------------|---------------------------------------|
| 840                                     | 846                                             | in-plane deformation in C-H           |
| 1010                                    | 994                                             | bending in NH <sub>2</sub>            |
| 1040                                    | 1046                                            | stretching in NH <sub>2</sub> and C-H |
| 1177                                    | 1172                                            | C-H bending in NH <sub>2</sub>        |
| 1243                                    | 1266                                            | in-plane deformation in benzene       |
| 1375                                    | 1392                                            | twisting in NH <sub>2</sub>           |
| 1463                                    | 1461                                            | asymmetric bending in N-H             |
| 1611                                    | 1616                                            | stretching in benzene ring            |
| 1780                                    | 1782                                            | bending in CH <sub>3</sub>            |



**Table S3.** Experimental Raman shifts (cm<sup>-1</sup>) of tetracycline (TC) [17].

| Experimental results /cm <sup>-1</sup> | Documented in the literature /cm <sup>-1</sup> | Assignment                                            |
|----------------------------------------|------------------------------------------------|-------------------------------------------------------|
| 818                                    | 747                                            | stretching and out of plane swing in NH               |
| 947                                    | 888                                            | bending in C-C                                        |
| 1078                                   | 1133                                           | stretching in C-O                                     |
| 1174                                   | 1175                                           | stretching in C-O                                     |
| 1277                                   | 1283                                           | stretching and out of plane swing in NC               |
| 1318                                   | 1347                                           | bending in C-H                                        |
| 1463                                   | 1459                                           | bending and out of plane swing in CH <sub>3</sub>     |
| 1590                                   | 1560                                           | stretching in C=O                                     |
| 1618                                   | 1619                                           | stretching and out of plane swing in COO <sup>-</sup> |

**Table S4.** Experimental Raman shifts (cm<sup>-1</sup>) of ofloxacin (OFX) [18].

| Experimental results /cm <sup>-1</sup> | Documented in the literature /cm <sup>-1</sup> | Assignment                           |
|----------------------------------------|------------------------------------------------|--------------------------------------|
| 1350                                   | 1353                                           | bending in C-C and stretching in C-H |
| 1405                                   | 1400                                           | stretching in COO <sup>-</sup>       |
| 1565                                   | 1542                                           | stretching in C=O                    |
| 1628                                   | 1627                                           | stretching in C=C                    |

**Table S5.** Determination of antibiotics in seawater samples and comparison with HPLC-MS method.

| Analytes     | Spiked<br>( $\mu\text{M}$ ) | This method                |                       |            | HPLC-MS method             |          |            |
|--------------|-----------------------------|----------------------------|-----------------------|------------|----------------------------|----------|------------|
|              |                             | Found<br>( $\mu\text{M}$ ) | R <sup>b</sup><br>(%) | RSD<br>(%) | Found<br>( $\mu\text{M}$ ) | R<br>(%) | RSD<br>(%) |
| Amoxicillin  | 0.0                         | ND <sup>a</sup>            | —                     | —          | ND                         | —        | —          |
|              | 10                          | 10.32                      | 91.69                 | 11.2       | 11.82                      | 98.94    | 6.9        |
|              | 50                          | 47.93                      | 95.84                 | 9.4        | 52.75                      | 97.69    | 7.3        |
| Tetracycline | 0.0                         | ND <sup>a</sup>            | —                     | —          | ND                         | —        | —          |
|              | 10                          | 9.56                       | 93.71                 | 12.4       | 10.14                      | 102.27   | 7.1        |
|              | 50                          | 56.48                      | 94.23                 | 10.8       | 51.34                      | 97.54    | 7.7        |
| Ofloxacin    | 0.0                         | ND <sup>a</sup>            | —                     | —          | ND                         | —        | —          |
|              | 10                          | 11.89                      | 92.32                 | 12.6       | 12.84                      | 99.63    | 8.2        |
|              | 50                          | 55.65                      | 94.47                 | 10.1       | 50.62                      | 96.43    | 7.6        |

<sup>a</sup> ND: lower than LOD

<sup>b</sup> R: recovery of the method

## References

- 1 P. Wang, L. Wu, Z. Lu, Q. Li, W. Yin, F. Ding, H. Han, *Anal. Chem.*, 2017, **89**, 2424-2431.
- 2 F. Shao, Z. Lu, C. Liu, H. Han, K. Chen, W. Li, J. Chen, *ACS Appl. Mater. Inter.*, 2014, **6**, 6281-6289.
- 3 X. Hu, T. Wang, L. Wang, S. Dong, *J. Phys. Chem. C*, 2007, **111**, 6962-6969.
- 4 K. Kim, J. Yoon, *Phys. Chem. B*, 2005, **109**, 20731-20736.
- 5 <http://www.chemicaland21.com>, 2007.
- 6 A. G. Ayankojo, J. Reut, R. Boroznjak, A. Öpik, V. Syrinski, *Sens. Actuators B Chem.*, 2018, **258**, 766-774.
- 7 S. M. Ghoreishi, M. Behpour, A. Khoobi, S. Masoum, *Arab. J. Chem.*, 2017, **10**, 3156-3166.
- 8 L. Shen, H. Wang, P. Chen, C. Yu, Y. Liang, C. Zhang, *J. Food Drug Anal.*, 2016, **24**, 199-205.
- 9 L. He, Y. Luo, W. Zhi, P. Zhou, *Food Anal. Methods*, 2013, **6**, 1704-1711.
- 10 M. Akhond, G. Absalan, H. Ershadifar, *Spectrochim. Acta A*, 2015, **143**, 223-229.
- 11 Y. Hu, X. Li, J. Liu, M. Wu, M. Li, X. Zang, *Anal. Methods*, 2018, **10**, 884-890.

- 12 Z. Luo, Y. Wang, X. Lu, J. Chen, F. Wei, Z. Huang, C. Zhou, Y. Duan, *Anal. Chim. Acta*, 2017, **984**, 177-184.
- 13 V. Moreno, A. Adnane, R. Salghi, M. Zougagh, Á. Ríos, *Talanta*, 2018, **194**, 357-362.
- 14 Y. Zhai, Y. Zheng, Z. Ma, Y. Cai, F. Wang, X. Guo, Y. Wen, H. Yang, *ACS Sens.*, 2019, **4**, 2958-2965.
- 15 L. Wang, G. Zhou, X. Guan, L. Zhou, *Spectrochim. Acta A*, 2020, **235**, 118-262.
- 16 G. Kibar, A. E. Topal, A. Dana, A. Tuncel, *J. Mol. Struct.*, 2016, **1119**, 133-138.
- 17 L. Qu, Y. Liu, M. Liu, G. Yang, D. Li, H. Li, *ACS Appl. Mater. Inter.*, 2016, **8**, 28180-28186.
- 18 M. R. El-Zahry, B. Lendl, *Spectrochim. Acta A*, 2018, **193**, 63-70.
